# Supplementary material
Source: publisher site journal article supplement (https://www.dovepress.com/get_supplementary_file.php?f=288522.docx)
Supplement: Supplementary file 1 [file get_supplementary_file.php]

**Supplementary Table S1. Detailed Frequencies of Adverse Events of Grade 3-4**

| **Adverse events (Grade 3-4)** |  | **All patients** |  | **Sarcopenia** |  | **Nonsarcopenia** |
| --- | --- | --- | --- | --- | --- | --- |
| Hematology |  | 46 |  | 37 |  | 9 |
| AST/ALT |  | 3 |  | 3 |  | 0 |
| Radiation esophagitis |  | 11 |  | 8 |  | 3 |
| Esophageal fistula |  | 6 |  | 3 |  | 3 |
| Esophageal stricture |  | 2 |  | 2 |  | 0 |
| Hemorrhage* |  | 1 |  | 1 |  | 0 |
| Radiation pneumonia |  | 3 |  | 2 |  | 1 |
| Infection |  | 18 |  | 15 |  | 3 |
| Lung |  | 10 |  | 8 |  | 2 |
| Digestive tract |  | 5 |  | 4 |  | 1 |
| Other infections |  | 3 |  | 1 |  | 2 |
| Nausea/vomiting |  | 4 |  | 4 |  | 0 |
| General fatigue |  | 16 |  | 12 |  | 4 |
| Totality |  | 64 |  | 54 |  | 10 |

Abbreviations: AST, Aspartate aminotransferase; ALT, Alanine aminotransferase.

* Upper gastrointestinal bleeding event
